# Supplementary material
Source: HighWire-hosted journal article supplement (https://openheart.bmj.com/content/8/1/e001615)

Grouped Scatter of QRSw by Max dP/dt (mmHg/s) by Patient

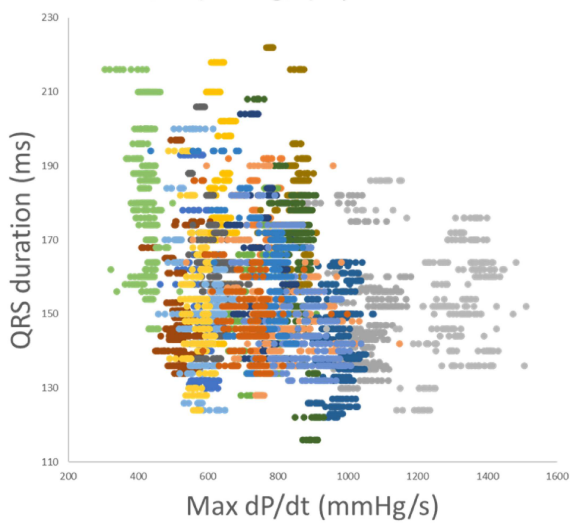

Example of summed ECG from multiple channels, 11 beats overlaid to confirm stability before manual measurement of QRS duration.

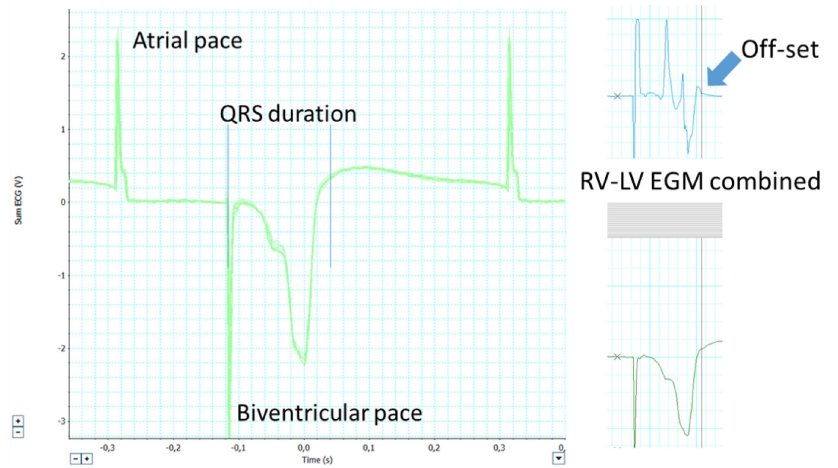

Supplement: inline-supplementary-material-4 [file inline-supplementary-material-4.pdf]
